# Supplementary material for: MOF-808 as a Highly Active Catalyst for the Diastereoselective Reduction of Substituted Cyclohexanones
Source: MDPI journal article supplement (doi:10.3390/molecules27196315), 2022-09-25
Supplement: s1 [file s1]

## **SUPPLEMENTARY MATERIALS**

### **MOF-808 as a highly active catalyst for the diastereoselective reduction of substituted cyclohexanones**

**H. H. Mautschke and F. X. Llabrés i Xamena**

## Structure and characterization of MOF-808

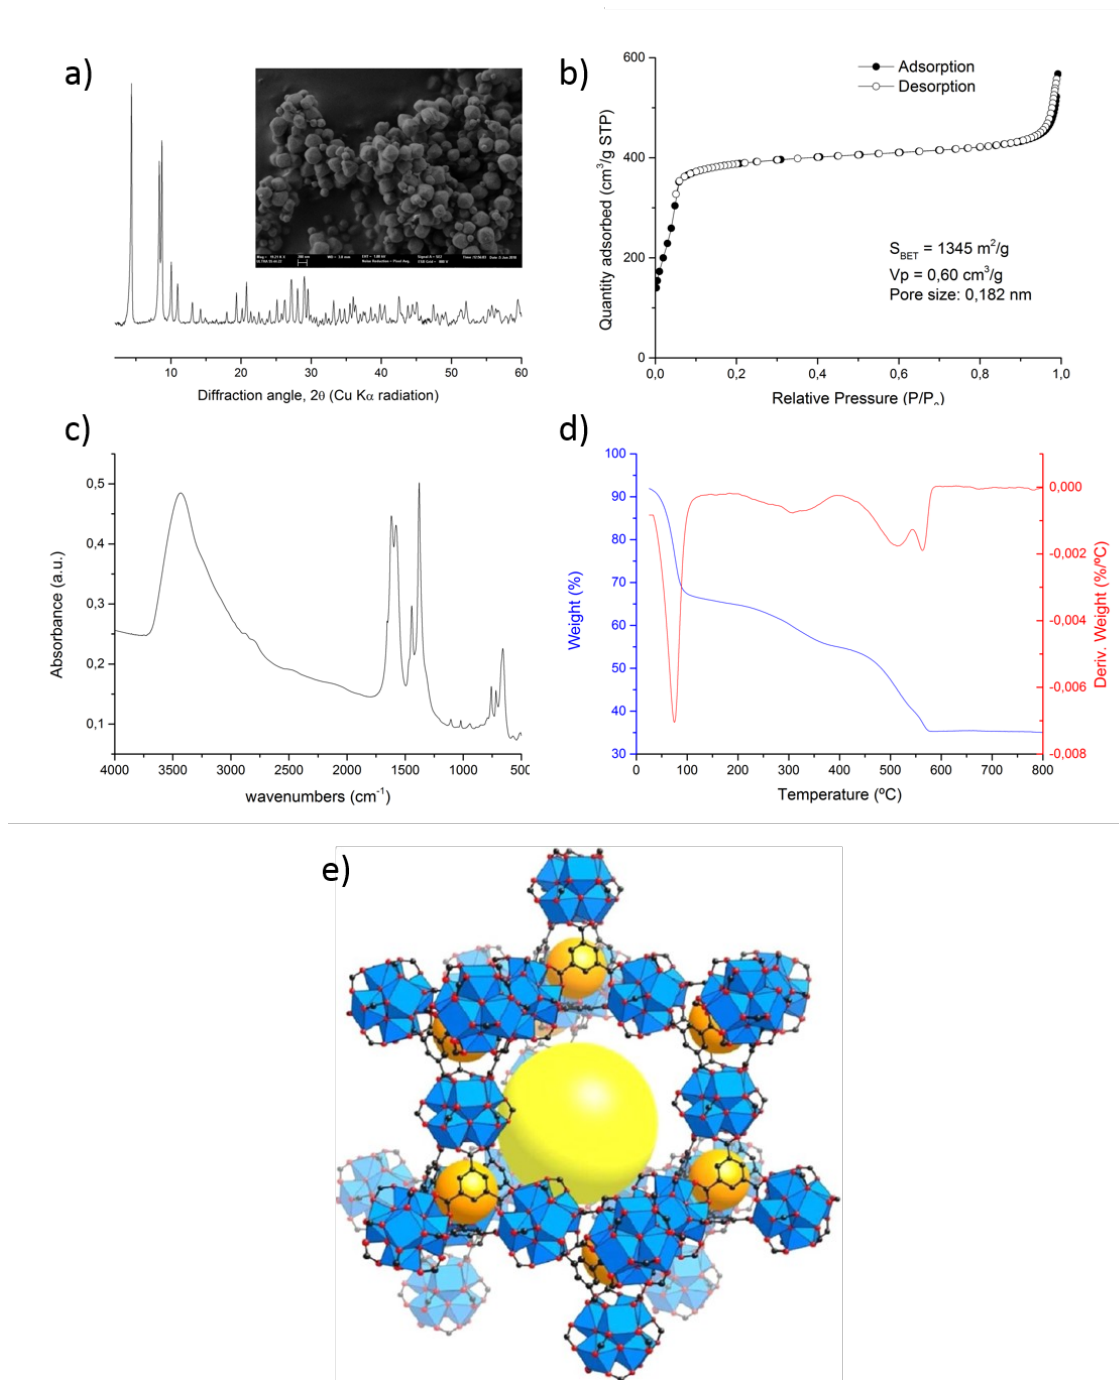

**Figure S1.** Characterization of MOF-808. a) XRD powder diffraction pattern (Cu K $\alpha$  radiation). The inset shows the corresponding FESEM image, in which the crystal size (ca. 200 nm) and the octahedral-shaped morphology is evidenced. b) N<sub>2</sub> adsorption/desorption isotherm (at 77K) and corresponding textural parameters. c) FTIR spectrum. The absorption bands observed are analogous to those previously described for MOF-808 (see for instance: J. Xu et al., *New J. Chem.* **2019**, 43, 4092–4099). d) TGA and DTG curves. e) Structure of MOF-808. Reproduced with permission from Furukawa et al. *J. Am. Chem. Soc.* **2014**, 136, 4369–4381. Copyright 2014 American Chemical Society.

## **Synthesis of other non-commercial catalysts used in the work**

**Zr-beta.** Preparation of this catalyst consisted of two steps:

### ***a) Synthesis of dealuminated Zr-beta seeds***

1.85 g of  $\text{AlCl}_3 \cdot 6\text{H}_2\text{O}$  were dissolved in 4.33 g of water. To this solution, 45.2 g of tetraethylammonium hydroxide solution (TEAOH, 35 wt. % in  $\text{H}_2\text{O}$ ) were added, followed by 40.0 g of tetraethyl orthosilicate (TEOS), and the mixture was stirred until evaporation of the ethanol formed by hydrolysis of TEOS. The final composition of the gel was:

$\text{SiO}_2$ : 0.56 TEAOH: 0.02  $\text{Al}_2\text{O}_3$ : 6.5  $\text{H}_2\text{O}$

The gel was then transferred into a teflon lined autoclave and heated to  $140^\circ\text{C}$  for 3 days with stirring. The solid product was recovered by filtration, washed with distilled water and dried at  $100^\circ\text{C}$ . The resulting zeolite was dealuminated by treating 1 g of the solid with 60 g of  $\text{HNO}_3$  (60 wt%) at  $80^\circ\text{C}$  for 24 h. The dealuminated solid was filtered, washed with water and dried at  $100^\circ\text{C}$ . The final Si/Al ratio of the solid was higher than 2000, as determined by elemental analysis.

### ***b) Synthesis of aluminum-free Zr-beta zeolite***

30 g of TEOS and 33.0 gr of TEAOH (35 wt. % in  $\text{H}_2\text{O}$ ) were placed inside a teflon lined autoclave. To this, a solution containing 0.39 g of  $\text{ZrOCl}_2 \cdot 8\text{H}_2\text{O}$  in 2.75 g water was added, and the mixture was stirred until evaporation of the ethanol formed by hydrolysis of TEOS. To this solution, 3.27 g of HF (48 wt%) were added, and the resulting viscous gel was mixed with a aqueous suspension of 0.36 g of preformed dealuminated Zr-beta seeds in 2 g of water. The final composition of the gel was:

$\text{SiO}_2$ : 0.54 TEAOH: 0.008  $\text{ZrO}_2$ : 0.54 HF: 7.5  $\text{H}_2\text{O}$

The gel was then heated to 140°C for 14 days with stirring. The solid product was recovered by filtration, washed with distilled water and dried at 100°C. The final Si/Zr ratio of the solid was 148, as determined by elemental analysis.

## Reusability of MOF-808

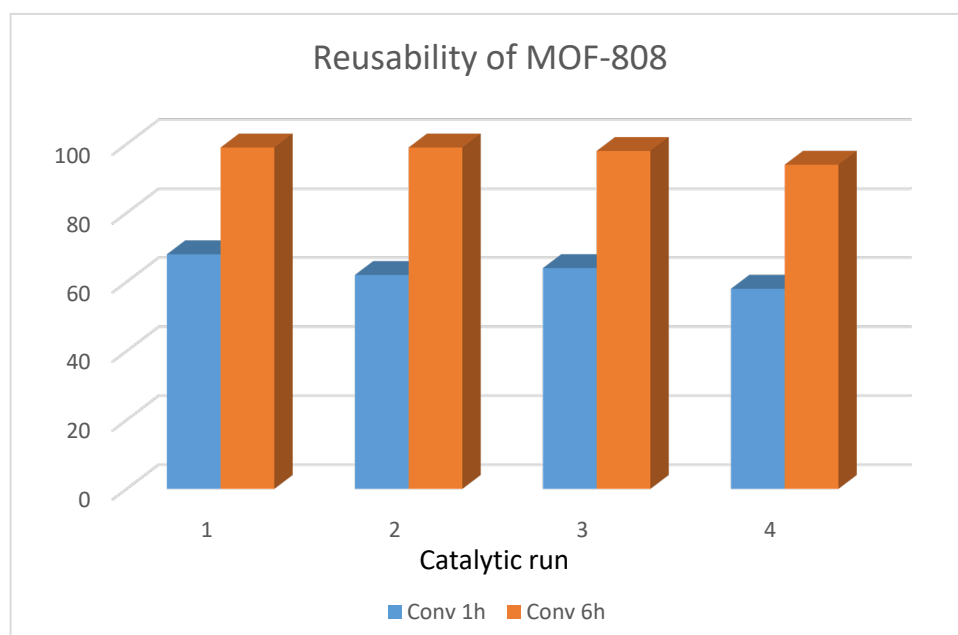

**Figure S2.** Conversion of 3MeCH=O obtained (after 1 and 6 h of reaction) after 4 consecutive cycles over MOF-808 using 2-BuOH as solvent at 80 °C.

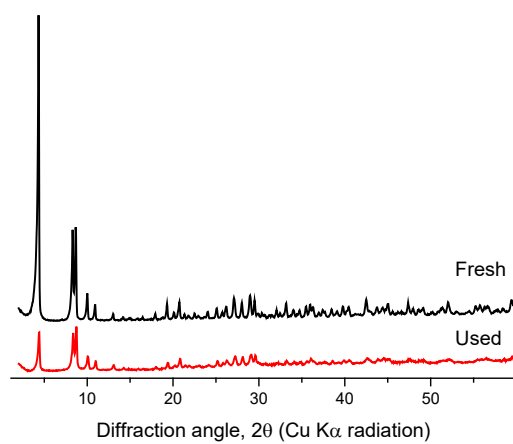

**Figure S3.** XRD powder diffraction pattern (Cu Kα radiation) of fresh MOF-808 and after four catalytic cycles of 3MeCH=O reduction.
